# Supplementary material for: Aqueous Preparation of Self-Supported Hydroxypropyl Methylcellulose-Polyaniline Conducting Films and the Evaluation of Their Electrical and Mechanical Properties
Source: Research Square preprint supplement (doi:10.21203/rs.3.rs-1347744/v1), 2022-03-02
Supplement: Supplementary file 1 [file 72079423c61df458421743ad.docx]

**Supplementary Information**

**AQUEOUS PREPARATION OF SELF-SUPPORTED HYDROXYPROPYL METHYLCELLULOSE-POLYANILINE CONDUCTING FILMS AND THE EVALUATION OF THEIR ELECTRICAL AND MECHANICAL PROPERTIES**

**Vinicius Cavalheiro Maedaa, Cintia Marques Correaa, Marcos Henrique Mamoru Otsuka Hamanakab, Viviane Nogueira Hamanakab, Celso Molinaa and Fernanda F. Camiloa***

**aDepartment of Chemistry, Federal University of São Paulo, Rua São Nicolau, 210 – Laboratório de Materiais Híbridos, CEP: 09913-030, Diadema, SP, Brazil**

**bAutocoat Equipamentos e Processos de Deposição LTDA, Rua Daniel Hogan, 434 - sala 25 - Cidade Universitária, CEP 13083-836, Campinas, SP, Brazil**

*Corresponding author:* Fernanda Ferraz Camilo

Laboratório de Materiais Híbridos, Instituto de Ciências Ambientais, Químicas e Farmacêuticas, Universidade Federal de São Paulo

Rua São Nicolau, 210, CEP: 09913-030, Diadema – SP, Brazil

Phone: +55 11 3319-3568

E-mail: ffcamilo@unifesp.br


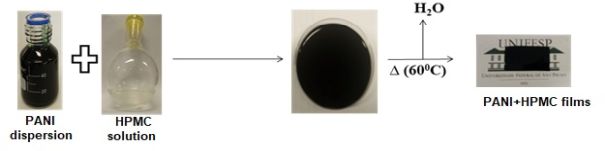


Figure 1S: Artwork representing the preparation of PANI_HPMC films





Figure 2S: SEM images of HPMC (A), PANI (B) and PANI_40%HPMC (C)

**
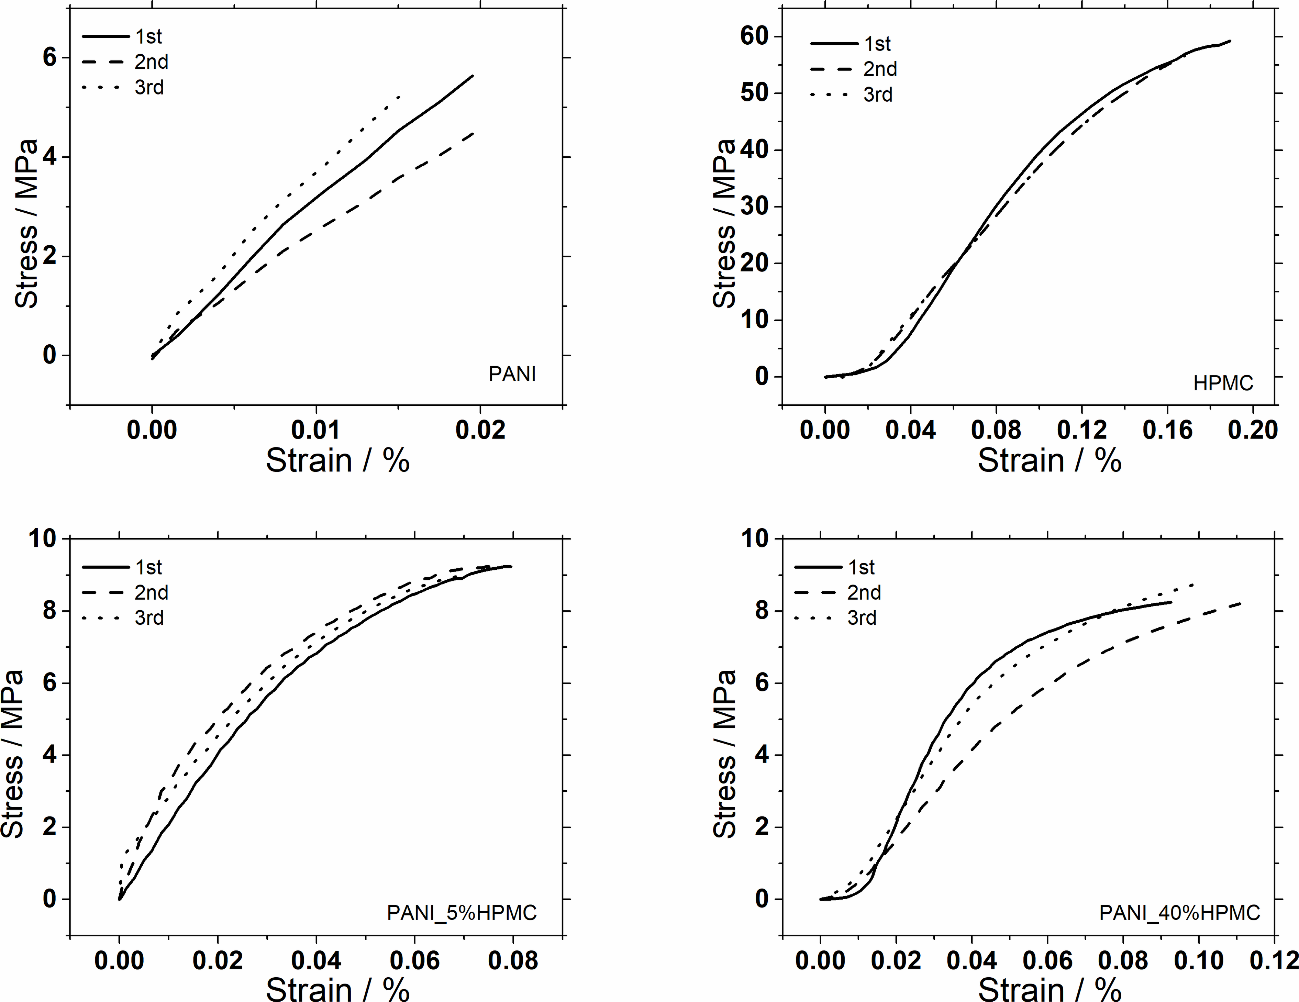
**

**Figure 3S: Stress–strain curves of the samples**

**Note 1**

**Chemical equation of polymerization of aniline by ammonium persulfate**

**Table 1S: Amounts of reagents**

|  | Aniline | (NH4)2S2O8 | PANI/ doped with 2 Cl- | PVP* |
| --- | --- | --- | --- | --- |
| molar mass (g mol-1) | 93 | 228 | 435 | -- |
| Initial number of mol (mmol) | 20 | 25 | ---- | ---- |
| Final number of mol (mmol) | ---- |  | 5.0 |  |
| Final mass (g) | ---- | ---- | 2.18 | 2.00 |

**it was added 50 mg of an aqueous solution of PVP (40 g L–1)*

- **Considering the stoichiometry of the reaction and the complete conversion (100 % yield), the total mass of the dispersion would be 4.18 g (2.18 g (PANI/2Cl-) + 2.00 g (PVP)**
- **Therefore, the PANI dispersion has 52 wt % of PANI and 48 wt% of PVP.**
